# Supplementary material for: Increased intraepithelial CD3+ T-lymphocytes and high PD-L1 expression on tumor cells are associated with a favorable prognosis in esophageal squamous cell carcinoma and allow prognostic immunogenic subgrouping
Source: PubMed Central journal article supplement (PMC5564521; doi:10.18632/oncotarget.18606), 2017-06-22
Supplement: oncotarget-08-46756-s001.pdf [file oncotarget-08-46756-s001.pdf]

## Increased intraepithelial CD3+ T-lymphocytes and high PD-L1 expression on tumor cells are associated with a favorable prognosis in esophageal squamous cell carcinoma and allow prognostic immunogenic subgrouping

### Supplementary Material

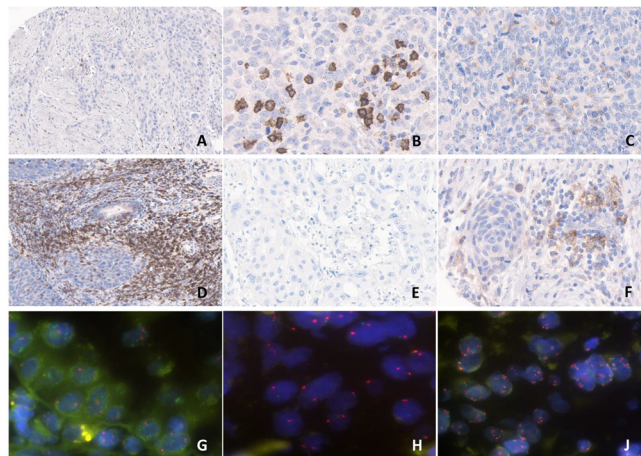

**Supplementary Figure 1:** Low (A) and high rates (B) of overall TILs (CD3+); low (C) and high (D) CD8i count; (E) high PD1i count; (F) overall PD-L1+ TILs; PD-L1 copy number status showing an (G) amplification, (H) a deletion and a polysomy (J).

**Supplementary Table 1: Rank-order correlations of overall TIL densities.**

|           | High CD3 | High CD3i          | High CD8           | High CD8i          | High PD-1          | High PD-1i         | High PD-L1+ TILs   | PD-L1 CNV           | PD-L1 high (tumor) |
|-----------|----------|--------------------|--------------------|--------------------|--------------------|--------------------|--------------------|---------------------|--------------------|
| High CD3  | x        | r=0.279<br>p=0.002 | r=0.357<br>p<0.001 | r=0.193<br>p=0.031 | r=0.252<br>p=0.006 | 0.304<br>p=0.001   | r=0.370<br>p<0.001 | r=0.044<br>p=0.567  | r=0.324<br>p<0.001 |
| High CD8  |          | r=0.417<br>p<0.001 | x                  | r=0.551<br>p<0.001 | r=0.321<br>p<0.001 | r=0.442<br>p<0.001 | r=0.261<br>p=0.004 | r=-0.082<br>p=0.046 | r=0.256<br>p=0.004 |
| High PD-1 |          | r=0.263<br>p=0.004 |                    | r=0.326<br>p<0.001 | x                  | r=0.793<br>p<0.001 | r=0.307<br>p=0.001 | r=0.108<br>p=0.597  | r=0.118<br>p=0.197 |

Supplementary Table 2: Multivariate analysis of the impact of CD3i / CD8i distribution and CD3i / PD-L1 subgroups on disease specific- and disease free survival.

|           |                 | HR (DSS) | lower CI | Upper CI | p-value | HR (DFS) | lower CI | Upper CI | p-value |
|-----------|-----------------|----------|----------|----------|---------|----------|----------|----------|---------|
| Age       | <i>per year</i> | 1,032    | 1,002    | 1,062    | 0,037   | 1,018    | 0,984    | 1,053    | 0,309   |
| Gender    | <i>male</i>     | 1,000    |          |          | 0,048   | 1,000    |          |          | 0,329   |
|           | <i>female</i>   | 0,496    | 0,247    | 0,995    |         | 0,688    | 0,324    | 1,46     |         |
| pN        | 0               | 1,000    |          |          | 0,059   | 1,000    |          |          | 0,103   |
|           | 1               | 1,143    | 0,667    | 1,959    |         | 1,261    | 0,694    | 2,292    |         |
|           | 2               | 0,419    | 0,11     | 1,592    |         | 0,731    | 0,237    | 2,256    |         |
|           | 3               | 6,059    | 1,245    | 29,479   |         | 6,287    | 1,255    | 31,503   |         |
| pT        | 1               | 1,000    |          |          | <0,001  | 1,000    |          |          | 0,001   |
|           | 2               | 4,009    | 2,156    | 7,458    |         | 4,157    | 2,09     | 8,266    |         |
|           | 3               | 2,228    | 1,054    | 4,708    |         | 2,194    | 0,978    | 4,924    |         |
|           | 4               | 7,244    | 0,709    | 74,005   |         | censored |          |          |         |
| PD-L1 TCs | <i>high</i>     | 1,000    |          |          | 0,009   | 1,000    |          |          | 0,001   |
|           | <i>low</i>      | 2,238    | 1,225    | 4,09     |         | 3,44     | 1,667    | 7,099    |         |

  

|        |                 | HR (DSS) | lower CI | Upper CI | p-value | HR (DFS) | lower CI | Upper CI | p-value |
|--------|-----------------|----------|----------|----------|---------|----------|----------|----------|---------|
| Age    | <i>per year</i> | 1,033    | 1,002    | 1,065    | 0,035   | 1,022    | 0,986    | 1,058    | 0,234   |
| Gender | <i>male</i>     | 1,000    |          |          | 0,009   | 1,000    |          |          | 0,063   |
|        | <i>female</i>   | 0,405    | 0,205    | 0,801    |         | 0,496    | 0,237    | 1,037    |         |
| pN     | 0               | 1,000    |          |          | 0,048   | 1,000    |          |          | 0,05    |
|        | 1               | 1,317    | 0,755    | 2,295    |         | 1,522    | 0,812    | 2,854    |         |
|        | 2               | 0,647    | 0,169    | 2,477    |         | 1,472    | 0,485    | 4,47     |         |
|        | 3               | 7,665    | 1,576    | 37,285   |         | 9,035    | 1,774    | 46,021   |         |
| pT     | 1               | 1,000    |          |          | <0,001  | 1,000    |          |          | 0,002   |
|        | 2               | 3,938    | 2,098    | 7,392    |         | 3,927    | 1,942    | 7,942    |         |
|        | 3               | 1,914    | 0,908    | 4,032    |         | 1,645    | 0,722    | 3,746    |         |
|        | 4               | 2,397    | 0,246    | 23,306   |         | censored |          |          |         |
| CD3i   | <i>high</i>     | 1,000    |          |          | 0,045   | 1,000    |          |          | 0,004   |
|        | <i>low</i>      | 1,778    | 1,013    | 3,122    |         | 2,571    | 1,341    | 4,928    |         |

  

|                   |                 | HR (DSS) | lower CI | Upper CI | p-value | HR (DFS) | lower CI | Upper CI | p-value |
|-------------------|-----------------|----------|----------|----------|---------|----------|----------|----------|---------|
| Age               | <i>per year</i> | 1,038    | 1,006    | 1,072    | 0,021   | 1,025    | 0,988    | 1,064    | 0,189   |
| Gender            | <i>male</i>     | 1,000    |          |          | 0,017   | 1,000    |          |          | 0,107   |
|                   | <i>female</i>   | 0,435    | 0,219    | 0,862    |         | 0,545    | 0,261    | 1,14     |         |
| pN                | 0               | 1,000    |          |          | 0,054   | 1,000    |          |          | 0,049   |
|                   | 1               | 1,379    | 0,784    | 2,424    |         | 1,569    | 0,832    | 2,961    |         |
|                   | 2               | 0,748    | 0,203    | 2,761    |         | 1,505    | 0,495    | 4,58     |         |
|                   | 3               | 7,458    | 1,531    | 36,334   |         | 8,878    | 1,747    | 45,106   |         |
| pT                | 1               | 1,000    |          |          | 0,002   | 1,000    |          |          | 0,006   |
|                   | 2               | 1,893    | 0,898    | 3,988    |         | 3,431    | 1,714    | 6,871    |         |
|                   | 3               | 3,517    | 1,868    | 6,622    |         | 1,689    | 0,746    | 3,826    |         |
|                   | 4               | 3,492    | 0,392    | 31,14    |         | censored |          |          |         |
| CD3i Distribution | <i>diffuse</i>  | 1,000    |          |          | 0,005   | 1,000    |          |          | 0,009   |
|                   | <i>focal</i>    | 2,267    | 1,273    | 4,035    |         | 2,348    | 1,237    | 4,458    |         |

  

|                   |                 | HR (DSS) | lower CI | Upper CI | p-value | HR (DFS) | lower CI | Upper CI | p-value |
|-------------------|-----------------|----------|----------|----------|---------|----------|----------|----------|---------|
| Age               | <i>per year</i> | 1,038    | 1,007    | 1,07     | 0,017   | 1,027    | 0,992    | 1,063    | 0,136   |
| Gender            | <i>male</i>     | 1,000    |          |          | 0,003   | 1,000    |          |          | 0,018   |
|                   | <i>female</i>   | 0,345    | 0,172    | 0,694    |         | 0,399    | 0,186    | 0,853    |         |
| pN                | 0               | 1,000    |          |          | 0,076   | 1,000    |          |          | 0,090   |
|                   | 1               | 1,221    | 0,71     | 2,099    |         | 1,325    | 0,725    | 2,422    |         |
|                   | 2               | 0,633    | 0,165    | 2,423    |         | 1,358    | 0,452    | 4,08     |         |
|                   | 3               | 6,875    | 1,415    | 33,409   |         | 7,712    | 1,536    | 38,725   |         |
| pT                | 1               | 1,000    |          |          | <0,001  | 1,000    |          |          | 0,001   |
|                   | 2               | 3,902    | 2,097    | 7,264    |         | 4,09     | 2,051    | 8,154    |         |
|                   | 3               | 2,061    | 0,981    | 4,332    |         | 1,959    | 0,875    | 4,383    |         |
|                   | 4               | 2,370    | 0,243    | 23,083   |         | censored |          |          |         |
| CD8i Distribution | <i>diffuse</i>  | 1,000    |          |          | 0,030   | 1,000    |          |          | 0,010   |
|                   | <i>focal</i>    | 1,882    | 1,063    | 3,332    |         | 2,397    | 1,236    | 4,650    |         |
